# Supplementary material for: Bayesian Decision Tree for the Classification of the Mode of Motion in Single-Molecule Trajectories
Source: PLoS One. 2013 Dec 20;8(12):e82799. doi: 10.1371/journal.pone.0082799 (PMC3869729; doi:10.1371/journal.pone.0082799)
Supplement: Source Code S2 — Code in C ( GenerateBrownianTrajin2ndOrderPot.c ) to generate a trajectory undergoing free Brownian motion confined in a 2nd order spring potential. (C) [file pone.0082799.s009.c]

#include <math.h>
#include <stdio.h>
#include <ctype.h>
#include <stdlib.h>
#include <string.h>
#include "simplex.c"

#define PI 3.1415926535897932384626433832795028841971693993751

#define k_boltzmann 1.3806503e-23
#define Temperature 294.15

#define IA1 40014
#define IA2 40692
#define IQ1 53668
#define IQ2 52774
#define IR1 12211
#define IR2 3791
#define IM1 2147483563
#define IM2 2147483399
#define EPS2 1.e-5

#define NTAB 10

#define IMM1 (IM1-1)
#define NDIV2 (1+IMM1/NTAB)
#define RNMX2 (1.0-EPS2)
#define AM2 (1.0/IM1)


/**********************************************************************************************************************/
/**********************************************************************************************************************/
/**********************************************************************************************************************/
/***********************************************************************************/

double ran2(long *idum){
    int j;
    long k;
    static long idum2=123456789;
    static long iy=0;
    static long iv[NTAB];
    float temp;
	
    if (*idum <= 0){
		if (-(*idum) < 1){*idum = 1;}
		else{*idum = -(*idum);}
		idum2 = (*idum);
		for (j=NTAB+7;j>=0;j--){
			k=(*idum)/IQ1;
			*idum=IA1*(*idum-k*IQ1)-k*IR1;
			if (*idum < 0){*idum += IM1;}
			if (j<NTAB){iv[j] = *idum;}
		}
		iy = iv[0];
    }
    k=(*idum)/IQ1;
    *idum=IA1*(*idum-k*IQ1)-k*IR1;
    if (*idum<0) *idum += IM1;
    k=idum2/IQ2;
    idum2=IA2*(idum2-k*IQ2)-k*IR2;
    if (idum2 < 0) idum2 += IM2;
    j=iy/NDIV2;
    iy=iv[j]-idum2;
    iv[j] = *idum;
    if (iy<1) iy += IMM1;
    if ((temp=AM2*iy) > RNMX2) return RNMX2;
    else return temp;
}

/***********************************************************************************/
/***********************************************************************************/

float gaussdev(long *idum){
	
	double ran2(long *idum);
	static int iset=0;
	static float gset;
	float fac,rsq,v1,v2;
	
	if (*idum < 0) iset=0;
	if (iset == 0) { 
		do {
			v1=2.0*ran2(idum)-1.0; 
			v2=2.0*ran2(idum)-1.0; 
			rsq=v1*v1+v2*v2;
		} while (rsq >= 1.0 || rsq == 0.0); 
		fac=sqrt(-2.0*log(rsq)/rsq);
		gset=v1*fac;
		iset=1; 
		return v2*fac;
	} else {
		iset=0; 
		return gset; 
	}
}
/****************************************************************************/
/****************************************************************************/
/*                    Force in X Direction                                  */
 /***************************************************************************/            
double f_x(double x,double y,double fvalue){
  
  double f;
  f=-2.0*fvalue*x;
  return f;
}

/****************************************************************************/
/*                    Force in Y Direction                                  */
 /***************************************************************************/
double f_y(double x,double y, double fvalue){
  double f;
  f=-2.0*fvalue*y;
  return f;
}
/***********************************************************************************/


/*****************************************************************/
/*******                  main                           *********/
/*****************************************************************/
int main(int argc, char *argv[]){
	
FILE *fp1;
int i,j;
int N_g,sd;
double x_g,y_g,intens,ttime,D_g,fmagnitude,StepSize,x_g_observed,y_g_observed,gamma_gen;
double theta,gamma,a_g,xprev_g,yprev_g,intensprev,ttimeprev,DT_g,D_g_min,D_g_max,a_noise,Pos_Noise;
long seed= -time(NULL);

N_g=1000;
sd=1000;
D_g=0.1;   // in µm2/s

DT_g=0.01;   // in s

Pos_Noise=0.000; // in µm

fmagnitude=0.1;  // in pN/µm  this is half the spring constant


fp1=fopen("Traj.txt","w");


x_g=0.0;
y_g=0.0;
intens=1;
ttime=0;

theta=gamma=a_g=xprev_g=yprev_g=intensprev=ttimeprev=x_g_observed=y_g_observed=0.0;

fprintf(fp1,"%f\t %f\t %f\n",x_g,y_g,ttime);

gamma_gen=k_boltzmann*Temperature/D_g; // gamma in m2 kg/ s µm2/s
gamma_gen=gamma_gen*1000000*1000000; // gamma in kg/s
gamma_gen=0.000001/gamma_gen; // to convert F to pN

for(i=1;i<N_g;i++){
    for(j=1;j<=sd;j++){
		theta = 2*PI*ran2(&seed);
		gamma=gaussdev(&seed);
		a_g=sqrt(4*D_g*DT_g/((double)sd))*gamma;
		xprev_g=x_g;
		yprev_g=y_g;
		intensprev=intens;
		ttimeprev=ttime;
		x_g=xprev_g+DT_g/((double)sd)*f_x(xprev_g,yprev_g,fmagnitude)*gamma_gen+a_g*cos(theta);
        y_g=yprev_g+DT_g/((double)sd)*f_y(xprev_g,yprev_g,fmagnitude)*gamma_gen+a_g*sin(theta);
		intens=1;
		ttime=ttime+DT_g;
    }
	
	a_noise=2.0*Pos_Noise*gamma;
	theta = 2*PI*ran2(&seed);
	
	x_g_observed=x_g+a_noise*cos(theta);
	y_g_observed=y_g+a_noise*sin(theta);
    
    fprintf(fp1,"%f\t %f\t %f\n",x_g_observed,y_g_observed,ttime/((double)sd));
    
	
}

fclose(fp1);
/******************************************************************************/


exit(0);
}	
/*****************************************************************/
/*****************************************************************/
