# Supplementary material for: Bayesian Decision Tree for the Classification of the Mode of Motion in Single-Molecule Trajectories
Source: PLoS One. 2013 Dec 20;8(12):e82799. doi: 10.1371/journal.pone.0082799 (PMC3869729; doi:10.1371/journal.pone.0082799)
Supplement: Source Code S4 — Code in C ( Model distinction in trajectory.c ) to calculate the information criteria for a given trajectory. This algorithm requires the files: nrutil.c (Source code S5), nrutil.h (Source code S6) and simplex.c (Source code S7). (C) [file pone.0082799.s011.c]

#include <math.h>
#include <stdio.h>
#include <ctype.h>
#include <stdlib.h>
#include <string.h>
#include "simplex.c"
#include <stdbool.h>


#define PI 3.1415926535897932384626433832795028841971693993751


#define IA1 40014
#define IA2 40692
#define IQ1 53668
#define IQ2 52774
#define IR1 12211
#define IR2 3791
#define IM1 2147483563
#define IM2 2147483399
#define EPS2 1.e-5

#define NTAB 10

#define IMM1 (IM1-1)
#define NDIV2 (1+IMM1/NTAB)
#define RNMX2 (1.0-EPS2)
#define AM2 (1.0/IM1)


#define NMAX 5000
#define GET_PSUM							\
for (j=0; j< ndim ; j++) {						\
for (sum=0.0, i=0; i < mpts; i++ ) sum += p[i][j];			\
psum[j]=sum; }
#define SWAP(a,b) {swap= (a); (a)=(b); (b)=swap;}


#define CON 1.4
#define CON2 (CON*CON)
#define BIG 1.0e30
#define NTAB 10
#define SAFE 2.0

#define NTAB2 32
#define IA 16807
#define IM 2147483647
#define AM (1.0/IM)
#define IQ 127773
#define IR 2836
#define NDIV (1+(IM-1)/NTAB)
#define RNMX (1.0-EPS)

static double maxarg1,maxarg2;
#define FMAX(a,b) ( maxarg1 = (a), maxarg2 = (b) , (maxarg1) > (maxarg2) ? \
(maxarg1) : (maxarg2) )


static double sqrarg;
#define SQR(a) ((sqrarg = (a)) == 0.0 ? 0.0 : sqrarg*sqrarg)


#define ITMAX 1000
#define EPS 3.e-11
#define TOLY (4*EPS)
#define STPMX 100.0

#define TOL 2.0e-6
#define ALF 1.0e-4
#define TOLX 1.0e-9

#define k_boltzmann 1.3806503e-23
  #define Temperature 294.15
  
  int Model;
  double logProb;
  
  long seed = -1;


/**********************************************************************************************************************/
/**********************************************************************************************************************/
/**********************************************************************************************************************/
/***********************************************************************************/
/**********************************************************************************************************************/
double ran1(long *idum){
  //\Minimal" random number generator of Park and Miller with Bays-Durham shu e and added
  //safeguards. Returns a uniform random deviate between 0.0 and 1.0 (exclusive of the endpoint
  //values). Call with idum a negative integer to initialize; thereafter, do not alter idum between
  //successive deviates in a sequence. RNMX should approximate the largest floating value that is
  //less than 1.
  
  int j;
  long k;
  static long iy=0;
  static long iv[NTAB2];
  double temp;
  
  if (*idum <= 0 || !iy) {
    if (-(*idum) < 1) *idum=1; 
    else *idum = -(*idum);
    for (j=NTAB2+7;j>=0;j--) {
      k=(*idum)/IQ;
      *idum=IA*(*idum-k*IQ)-IR*k;
      if (*idum < 0) *idum += IM;
      if (j < NTAB2) iv[j] = *idum;
    }
    iy=iv[0];
  }
  k=(*idum)/IQ; 
  *idum=IA*(*idum-k*IQ)-IR*k;
  if  (*idum < 0)  *idum += IM;
  j=iy/NDIV; 
  iy=iv[j]; 
  iv[j] = *idum; 
  if ((temp=AM*iy) > RNMX) return RNMX; 
  else return temp;
}
/*****************************************************************************************************/

double ran2(long *idum){
    int j;
    long k;
    static long idum2=123456789;
    static long iy=0;
    static long iv[NTAB];
    float temp;
	
    if (*idum <= 0){
		if (-(*idum) < 1){*idum = 1;}
		else{*idum = -(*idum);}
		idum2 = (*idum);
		for (j=NTAB+7;j>=0;j--){
			k=(*idum)/IQ1;
			*idum=IA1*(*idum-k*IQ1)-k*IR1;
			if (*idum < 0){*idum += IM1;}
			if (j<NTAB){iv[j] = *idum;}
		}
		iy = iv[0];
    }
    k=(*idum)/IQ1;
    *idum=IA1*(*idum-k*IQ1)-k*IR1;
    if (*idum<0) *idum += IM1;
    k=idum2/IQ2;
    idum2=IA2*(idum2-k*IQ2)-k*IR2;
    if (idum2 < 0) idum2 += IM2;
    j=iy/NDIV2;
    iy=iv[j]-idum2;
    iv[j] = *idum;
    if (iy<1) iy += IMM1;
    if ((temp=AM2*iy) > RNMX2) return RNMX2;
    else return temp;
}

/***********************************************************************************/
/***********************************************************************************/

float gaussdev(long *idum){
	
	double ran2(long *idum);
	static int iset=0;
	static float gset;
	float fac,rsq,v1,v2;
	
	if (*idum < 0) iset=0;
	if (iset == 0) { 
		do {
			v1=2.0*ran2(idum)-1.0; 
			v2=2.0*ran2(idum)-1.0; 
			rsq=v1*v1+v2*v2;
		} while (rsq >= 1.0 || rsq == 0.0); 
		fac=sqrt(-2.0*log(rsq)/rsq);
		gset=v1*fac;
		iset=1; 
		return v2*fac;
	} else {
		iset=0; 
		return gset; 
	}
}
/****************************************************************************/
double decoupeur(int n, int n_zone_x, int n_zone_y, double *x, double *y, double *t,double x_min[1],double x_max[1], double y_min[1],double y_max[1],double delta_x[1], double delta_y[1],int **quelle_zone_occupee,int **counts_in_zone, int nombre_total_de_varaibles[1], double **x_centre, double **y_centre, double x_centre_tot[1],double y_centre_tot[1] ){
	int ii, jj, kk,indice_position_x, indice_position_y, indice_position; 
	int i,j,k,indice_x_test, indice_y_test;
	double x_test, y_test;
	double moyenne_x, moyenne_y;
	
	//find minima and maxima//////
	
	x_min[0]= 10000.; x_max[0]=-10000.; y_min[0] =10000.; y_max[0] = -10000.; 
	for (ii=0; ii<n; ii++){
		if (x[ii]< x_min[0] ){
			x_min[0] = x[ii];
		}
		if (x[ii]> x_max[0] ){
			x_max[0] = x[ii];
		}
		if (y[ii]< y_min[0] ){
			y_min[0] = y[ii];
		}
		if (y[ii]> y_max[0] ){
			y_max[0] = y[ii];
		}
	}
	
	moyenne_x=0.;
	moyenne_y=0.;
	for (ii=0; ii<n; ii++){
		moyenne_x += x[ii];
		moyenne_y += y[ii];
	}
	
	x_centre_tot[0] = moyenne_x/n;
	y_centre_tot[0] = moyenne_y/n;
	
	delta_x[0] =(x_max[0]-x_min[0])/n_zone_x;
	delta_y[0] =(y_max[0]-y_min[0])/n_zone_y ;
	
	for (i=0; i<n_zone_x; i++){
		for (j=0; j<n_zone_y; j++){
			quelle_zone_occupee[i][j]=0;
			counts_in_zone[i][j]=0;
		}
	}
	
	for (i=0; i<n; i++){
		x_test=x[i];
		y_test=y[i];
		if (x_test == x_max[0]){
			indice_x_test = n_zone_x-1;
		} else{
			indice_x_test =  (int) floor( (x_test-x_min[0]) / ( delta_x[0])  );
		}
		if (y_test == y_max[0]){
			indice_y_test = n_zone_y-1;
		} else {
			indice_y_test =  (int) floor( (y_test-y_min[0]) / (delta_y[0] )  );
		}
		quelle_zone_occupee[indice_x_test][indice_y_test]=1;
		counts_in_zone[indice_x_test][indice_y_test]+=1;
	}
	
	nombre_total_de_varaibles[0]=0;
	for (i=0; i<n_zone_x; i++){
		for (j=0; j<n_zone_y; j++){
			nombre_total_de_varaibles[0] +=  quelle_zone_occupee[i][j];
		}
	}
	nombre_total_de_varaibles[0] *=1;
	
	for (i=0; i<n_zone_x; i++){
		for (j=0; j<n_zone_y; j++){
			x_centre[i][j] = x_min[0]+delta_x[0]/2.+i*delta_x[0];
			y_centre[i][j] = y_min[0]+delta_y[0]/2.+j*delta_y[0];
		}
	}
	
	
	
	return;
}
/*****************************************************************/
/*****************************************************************/
/*****************************************************************/

/*****************************************************************/
/*****************************************************************/
double valeur_force_x(int ordre_polynome, int nombre_coefficient, double *coefficient_et_D_init_puis_resultat, double x_centre_tot[1], double y_centre_tot[1], double x, double y, double gamma ){
  int i,j,k,l,indice,ii,jj,kk;
  double valeur1;
  int puissance_x, puissance_y;
  double valeur_intermediaire_x,valeur_intermediaire_y; 
  
  indice = 0;
  valeur1=0.;
  //valeur= coefficient_et_D_init_puis_resultat[indice];
  // attention le premier coefficient correspond au terme (x-x_centre)
  for (k=1; k<= ordre_polynome;k++   ){
    for (l=0; l<= k;l++   ){
      
      
      valeur_intermediaire_x =1.;
      valeur_intermediaire_y =1.;
      for (ii=1; ii<=k-l-1; ii++){
	valeur_intermediaire_x *= (x-x_centre_tot[0]);
      }
      for (ii=1; ii<=l; ii++){
	valeur_intermediaire_y *= (y-y_centre_tot[0]);
      }
      valeur1 +=  -coefficient_et_D_init_puis_resultat[indice]*(k-l)*valeur_intermediaire_x*valeur_intermediaire_y;
      indice += 1;
    }
  }
  
  valeur1=valeur1*gamma;
  
  return valeur1; 
}
/*****************************************************************/
/*****************************************************************/
/*****************************************************************/
/*****************************************************************/
double valeur_force_y(int ordre_polynome, int nombre_coefficient, double *coefficient_et_D_init_puis_resultat, double x_centre_tot[1], double y_centre_tot[1], double x, double y, double gamma ){
  int i,j,k,l,indice,ii,jj,kk;
  double valeur2;
  int puissance_x, puissance_y;
  double valeur_intermediaire_x,valeur_intermediaire_y; 
  
  indice = 0;
  valeur2 =0.;
  //valeur= coefficient_et_D_init_puis_resultat[indice];
  // attention le premier coefficient correspond au terme (x-x_centre)
  for (k=1; k<= ordre_polynome;k++   ){
    for (l=0; l<= k;l++   ){
      
      
      valeur_intermediaire_x =1.;
      valeur_intermediaire_y =1.;
      for (ii=1; ii<=k-l; ii++){
	valeur_intermediaire_x *= (x-x_centre_tot[0]);
      }
      for (ii=1; ii<=l-1; ii++){
	valeur_intermediaire_y *= (y-y_centre_tot[0]);
      }
      valeur2 +=  -coefficient_et_D_init_puis_resultat[indice]*(l)*valeur_intermediaire_x*valeur_intermediaire_y;
      indice += 1;
    }
  }
  
  valeur2=valeur2*gamma;
  
  return valeur2; 
}
/*****************************************************************/


/*****************************************************************/
/*****************************************************************/
double propagateurM1(int ordre_polynome, int nombre_coefficient,int ndim, double *coefficient_et_D_init_puis_resultat, double x_centre_tot[1], double y_centre_tot[1],double dimension_max[1],  double x_debut, double x_fin, double y_debut, double y_fin, double t_debut, double t_fin, double x_min[1],double x_max[1], double y_min[1],double y_max[1],double delta_x[1], double delta_y[1], double **x_centre, double **y_centre,int n_zone_x, int n_zone_y ){
	double res_log;
	double D1,A1;
	
	D1=coefficient_et_D_init_puis_resultat[0];
	A1=1.0;
	
	// BROWNIAN MOTION PROPAGATOR with constant D
	res_log = log(A1)-log(4*PI*D1*(t_fin-t_debut)) -(x_fin-x_debut)*(x_fin-x_debut)/(4*D1*(t_fin-t_debut)) - (y_fin-y_debut)*(y_fin-y_debut)/(4*D1*(t_fin-t_debut));
	
	
	return res_log;
}

/*****************************************************************/
/*****************************************************************/
/***********************************************************************************************/
/*****************************************************************/
double propagateurM4(int ordre_polynome, int nombre_coefficient,int ndim, double *coefficient_et_D_init_puis_resultat, double x_centre_tot[1], double y_centre_tot[1],double dimension_max[1],  double x_debut, double x_fin, double y_debut, double y_fin, double t_debut, double t_fin, double x_min[1],double x_max[1], double y_min[1],double y_max[1],double delta_x[1], double delta_y[1], double **x_centre, double **y_centre,int n_zone_x, int n_zone_y ){
	double res_log;
	int indice_x_debut, indice_y_debut;
	double fx, fy;
	double D;
	double gamma;
	
    if (x_debut == x_max[0]){
		indice_x_debut = n_zone_x-1;
	} else{
		indice_x_debut =  (int) floor( (x_debut-x_min[0]) / ( delta_x[0])  );
	}
	if (y_debut == y_max[0]){
		indice_y_debut = n_zone_y-1;
	} else {
		indice_y_debut =  (int) floor( (y_debut-y_min[0]) / (delta_y[0] )  );
	}
	
	D=coefficient_et_D_init_puis_resultat[ndim-1];
	gamma=k_boltzmann*Temperature/D; // gamma in m2 kg/ s �m2/s
	gamma=gamma*1000000*1000000; // gamma in kg/s
	gamma=0.000001/gamma; // to convert Vpot to pJ
	
	fx = valeur_force_x( ordre_polynome, nombre_coefficient, coefficient_et_D_init_puis_resultat,  x_centre_tot, y_centre_tot, x_centre[indice_x_debut][indice_y_debut], y_centre[indice_x_debut][indice_y_debut], gamma );
	fy = valeur_force_y( ordre_polynome, nombre_coefficient, coefficient_et_D_init_puis_resultat,  x_centre_tot, y_centre_tot,x_centre[indice_x_debut][indice_y_debut], y_centre[indice_x_debut][indice_y_debut], gamma );
	
	// BROWNIAN MOTION PROPAGATOR IN SPRING POTENTIAL with Dconst	
    res_log = -log(4*PI*D*(t_fin-t_debut)) -(x_fin-x_debut-fx*(t_fin-t_debut) )*(x_fin-x_debut-fx*(t_fin-t_debut) )/(4*D*(t_fin-t_debut)) - (y_fin-y_debut-fy*(t_fin-t_debut) )*(y_fin-y_debut-fy*(t_fin-t_debut) )/(4*D*(t_fin-t_debut));
	
	
	return res_log;
}

/*****************************************************************/
/*****************************************************************/

double posterior_of_the_motion(int n, int ordre_polynome, int nombre_coefficient,int ndim, double *coefficient_et_D_init_puis_resultat, double x_centre_tot[1], double y_centre_tot[1],double dimension_max[1],  double *x, double *y, double *t,double x_min[1],double x_max[1], double y_min[1],double y_max[1],double delta_x[1], double delta_y[1], double **x_centre, double **y_centre,int n_zone_x, int n_zone_y ){
	
	int i,j,k,indice;
	int indice_x_debut, indice_x_fin, indice_y_fin , indice_y_debut;
	double x_debut, y_debut, x_fin,y_fin,t_fin, t_debut;
	double res;
	

	
	res =0.;
	for (i=0; i<n-1; i++){
		x_debut = x[i];
		x_fin   = x[i+1];
		y_debut = y[i];
		y_fin   = y[i+1];
		t_debut = t[i];
		t_fin   = t[i+1];
		if (Model==1){
		res += propagateurM1(ordre_polynome, nombre_coefficient,ndim, coefficient_et_D_init_puis_resultat, x_centre_tot,y_centre_tot, dimension_max,  x_debut, x_fin, y_debut,  y_fin,  t_debut,  t_fin, x_min, x_max, y_min, y_max,delta_x, delta_y,x_centre,y_centre,n_zone_x, n_zone_y );
		// fprintf(stderr, "%i\n", i);
        }
        if (Model==4){
		res += propagateurM4(ordre_polynome, nombre_coefficient,ndim, coefficient_et_D_init_puis_resultat, x_centre_tot,y_centre_tot, dimension_max,  x_debut, x_fin, y_debut,  y_fin,  t_debut,  t_fin, x_min, x_max, y_min, y_max,delta_x, delta_y,x_centre,y_centre,n_zone_x, n_zone_y );
		// fprintf(stderr, "%i\n", i);
        }
	}

	
	logProb=-res;
	
	return -res;
}
/*****************************************************************/
/*****************************************************************/
void dfpmin( int n, int ordre_polynome, int nombre_coefficient,int ndim, double x_centre_tot[1], double y_centre_tot[1],double dimension_max[1], double *x, double *y, double *t,double x_min[1],double x_max[1], double y_min[1],double y_max[1],double delta_x[1], double delta_y[1], double **x_centre, double **y_centre   ,int n_zone_x, int n_zone_y ,                     
			double p[], double gtol, int iter[], double fret[], 
			double (func)(int n, int ordre_polynome, int nombre_coefficient,int ndim,double [], double x_centre_tot[1], double y_centre_tot[1],double dimension_max[1], double *x, double *y, double *t,double x_min[1],double x_max[1], double y_min[1],double y_max[1],double delta_x[1], double delta_y[1], double **x_centre, double **y_centre,int n_zone_x, int n_zone_y  ),
			void (dfunc)(int n, int ordre_polynome, int nombre_coefficient,int ndim, double x_centre_tot[1], double y_centre_tot[1],double dimension_max[1],  double *x, double *y, double *t ,double x_min[1],double x_max[1], double y_min[1],double y_max[1],double delta_x[1], double delta_y[1], double **x_centre, double **y_centre,int n_zone_x, int n_zone_y ,  double (func)(int n, int ordre_polynome, int nombre_coefficient,int ndim,double [], double x_centre_tot[1], double y_centre_tot[1],double dimension_max[1],double *x, double *y, double *t,double x_min[1],double x_max[1], double y_min[1],double y_max[1],double delta_x[1], double delta_y[1], double **x_centre, double **y_centre,int n_zone_x, int n_zone_y   ),
						 double [], double []) ){
				
				
				
				
				
				void lnsrch( int n, int ordre_polynome, int nombre_coefficient,int ndim, double x_centre_tot[1], double y_centre_tot[1],double dimension_max[1],  double *x, double *y, double *t   ,  double x_min[1],double x_max[1], double y_min[1],double y_max[1],double delta_x[1], double delta_y[1], double **x_centre, double **y_centre,int n_zone_x, int n_zone_y ,
							double xold[], double fold, double g[] , double p[], double xx[] , double f[], double stpmax, int check[], 
							double (func)(int n, int ordre_polynome, int nombre_coefficient,int ndim,double [], double x_centre_tot[1], double y_centre_tot[1],double dimension_max[1],double *x, double *y, double *t,double x_min[1],double x_max[1], double y_min[1],double y_max[1],double delta_x[1], double delta_y[1], double **x_centre, double **y_centre, int n_zone_x, int n_zone_y  )  );
				
				
				int check[1], i, ii, its, j;
				double den,fac,fad,fae,fp,stpmax,sum=0.0,sumdg, sumxi,temp,test;
				double *dg, *g, *hdg, **hessin, *pnew, *xi;
				
				dg   = (double *)malloc((size_t) (ndim)*sizeof(double ));
				g    = (double *)malloc((size_t) (ndim)*sizeof(double ));
				hdg  = (double *)malloc((size_t) (ndim)*sizeof(double ));
				pnew = (double *)malloc((size_t) (ndim)*sizeof(double ));
				xi   = (double *)malloc((size_t) (ndim)*sizeof(double ));
				//fret   = (double *)malloc((size_t) (1)*sizeof(double ));
				//iter   = (int *)malloc((size_t) (1)*sizeof(int ));
				
				hessin = (double **)malloc((size_t) (ndim)*sizeof(double *));
				for (ii=0; ii < ndim; ii++){
					hessin[ii]= (double *)malloc((size_t) (ndim)*sizeof(double ));
				}
				
				// fp = (func)(p);
				// (dfunc)(ndim,(func), p,g);
				fp = (func)(n,ordre_polynome,nombre_coefficient,ndim, p, x_centre_tot,y_centre_tot,dimension_max,x,y,t,x_min, x_max,  y_min, y_max, delta_x,  delta_y, x_centre, y_centre, n_zone_x, n_zone_y );
				(dfunc)(n,ordre_polynome,nombre_coefficient,ndim,x_centre_tot,y_centre_tot,dimension_max,x,y,t,x_min, x_max,  y_min, y_max, delta_x,  delta_y, x_centre, y_centre, n_zone_x, n_zone_y  ,(func), p,g);
				
				
				for (i=0;i<ndim;i++){
					for (j=0; j<ndim; j++) hessin[i][j]=0.0;
					hessin[i][i]=1.0;
					xi[i] = -g[i];
					sum += p[i]*p[i];
				}
				
				stpmax = STPMX*FMAX(sqrt(sum), (double)ndim);
				
				for ( its=0; its<ITMAX; its++){
					iter[0]=its;
					
					//   lnsrch(ndim,p,fp,g,xi,pnew,fret,stpmax,check,func);
					lnsrch(n,ordre_polynome,nombre_coefficient,ndim,x_centre_tot,y_centre_tot,dimension_max,x,y,t,x_min, x_max,  y_min, y_max, delta_x,  delta_y, x_centre, y_centre, n_zone_x, n_zone_y  , p,fp,g,xi,pnew,fret,stpmax,check,(func));
					
					
					fp = fret[0];
					
					for (i=0; i<ndim; i++){
						xi[i] =pnew[i]-p[i];
						p[i] = pnew[i];
					}
					test =0.0;
					for (i=0 ; i<ndim ; i++){
						temp = fabs(xi[i])/FMAX(fabs(p[i]), 1.0);
						if (temp > test) {test = temp;}
					}
					if (test<TOLY){
						return;
					}
					
					for (i=0 ; i<ndim ; i++){ dg[i]=g[i];}
					
					//(dfunc)(ndim,(func),p,g);
					(dfunc)(n,ordre_polynome,nombre_coefficient,ndim,x_centre_tot,y_centre_tot,dimension_max,x,y,t,x_min, x_max,  y_min, y_max, delta_x,  delta_y, x_centre, y_centre, n_zone_x, n_zone_y   ,(func), p,g);
					
					
					
					test = 0.0;
					den = FMAX(fret[0],1.0);
					for (i=0; i<ndim ;  i++){
						temp = fabs(g[i])*FMAX(fabs(p[i]),1.0)/den;
						if (temp > test) {test =temp;}
					}
					
					if (test < gtol){
						return;
					}
					
					for (i=0; i<ndim; i++) {dg[i] = g[i]-dg[i];}
					for (i=0; i<ndim; i++) {
						hdg[i] = 0.0;
						for (j=0; j<ndim; j++){ hdg[i] += hessin[i][j]*dg[j];}
					}
					fac =fae = sumdg = sumxi = 0.0;
					for (i=0; i<ndim ; i++) {
						fac += dg[i]*xi[i];
						fae += dg[i]*hdg[i];
						sumdg += SQR(dg[i]);
						sumxi += SQR(xi[i]);
					}
					
					if (fac > sqrt(EPS*sumdg*sumxi)){
						fac = 1.0/fac;
						fad = 1.0/fae;
						for (i=0; i<ndim; i++ ){ dg[i]= fac*xi[i]-fad*hdg[i];}
						for (i=0;i<ndim ;i++){
							for (j=i ; j<ndim ; j++ ){
								hessin[i][j] += fac*xi[i]*xi[j]
								- fad*hdg[i]*hdg[j] + fae*dg[i]*dg[j];
								hessin[j][i] = hessin[i][j];
							}
						}
					}
					for (i=0; i<ndim ; i++) {
						xi[i] =0.0;
						for (j=0; j<ndim; j++) xi[i] -= hessin[i][j]*g[j];
					}
				}
				fprintf(stderr,"ca merde"); return; exit(-1);
			}
/*****************************************************************/
/*****************************************************************/
/*****************************************************************/
/*****************************************************************/
/*****************************************************************/
/*****************************************************************/
void lnsrch( int n, int ordre_polynome, int nombre_coefficient,int ndim, double x_centre_tot[1], double y_centre_tot[1],double dimension_max[1], double *x, double *y, double *t   , double x_min[1],double x_max[1], double y_min[1],double y_max[1],double delta_x[1], double delta_y[1], double **x_centre, double **y_centre, int n_zone_x, int n_zone_y ,
			double xold[], double fold, double g[] , double p[], double xx[] , double f[], double stpmax, int check[], 
			double (func)(int n, int ordre_polynome, int nombre_coefficient,int ndim,double [], double x_centre_tot[1], double y_centre_tot[1],double dimension_max[1],double *x, double *y, double *t,double x_min[1],double x_max[1], double y_min[1],double y_max[1],double delta_x[1], double delta_y[1], double **x_centre, double **y_centre, int n_zone_x, int n_zone_y  )  ){
	
	int i;
	double a,alam, alam2, alamin, b, disc, f2, rhs1, rhs2, slope, sum, temp, test, tmplam;
	
	//check =  (int *)malloc((size_t) (1)*sizeof(int ));
	//f     =  (double *)malloc((size_t) (1)*sizeof(double ));
	
	check[0]=0;
	for (sum=0.0, i=0; i<ndim; i++){ sum += p[i]*p[i];}
	sum = sqrt(sum);
	
	if (sum > stpmax)
		for (i=0; i<ndim;i++) p[i] *= stpmax/sum;
	for (slope=0.0, i=0;i<ndim;i++ )
		slope += g[i]*p[i];  
	if (slope >= 0.0) {fprintf(stderr, " pas de bol ca marche pas"); return; exit(1);}
	test = 0.0;
	for (i=0; i<ndim; i++){
		temp = fabs(p[i])/FMAX(fabs(xold[i]),1.0); 
		if (temp > test) test = temp;
	}
	alamin = TOLX/test;
	alam = 1.0;
	for (;;) {
		for (i=0;i<ndim;i++) xx[i]=xold[i]+alam*p[i];
		
		//f[0] = (func)(xx);
		f[0] =   (func)(n,ordre_polynome,nombre_coefficient,ndim, xx, x_centre_tot,y_centre_tot,dimension_max,x,y,t,x_min, x_max,  y_min, y_max, delta_x,  delta_y, x_centre, y_centre, n_zone_x, n_zone_y  );
		
		
		if (alam < alamin) {
			for (i=0; i<ndim ; i++){ xx[i] = xold[i];}
			check[0]=1;
			return ;
		} else if (f[0] <= fold +ALF*alam*slope) {return;}
		else {
			if (alam == 1.0)
				tmplam = -slope/(2.0*(f[0] - fold -slope));
			else {
				rhs1 = f[0] -fold -alam*slope;
				rhs2 = f2 - fold -alam2*slope;
				a = (rhs1/(alam*alam) - rhs2/(alam2*alam2))/(alam - alam2);
				b = (-alam2*rhs1/(alam*alam)+alam*rhs2/(alam2*alam2))/(alam-alam2);
				if (a == 0.0){ tmplam = -slope/(2.0*b);}
				else {
					disc = b*b-3.0*a*slope;
					if (disc < 0.0){ tmplam = 0.5*alam;}
					else if (b <=0.0){ tmplam = (-b +sqrt(disc))/(3.0*a);}
					else {tmplam = -slope/(b+sqrt(disc));}
				}
				
				if (tmplam > 0.5 *alam)
					tmplam = 0.5 *alam;
			}
		}
		alam2 = alam;
		f2 =f[0];
		alam = FMAX(tmplam, 0.1*alam);
	}
	
}
/*****************************************************************/
/*****************************************************************/
/*****************************************************************/
void dfunc(int n, int ordre_polynome, int nombre_coefficient,int ndim, double x_centre_tot[1], double y_centre_tot[1],double dimension_max[1],  double *x, double *y, double *t ,double x_min[1],double x_max[1], double y_min[1],double y_max[1],double delta_x[1], double delta_y[1], double **x_centre, double **y_centre,int n_zone_x, int n_zone_y ,
		   double (func)(int n, int ordre_polynome, int nombre_coefficient,int ndim,double [], double x_centre_tot[1], double y_centre_tot[1],double dimension_max[1], double *x, double *y, double *t,double x_min[1],double x_max[1], double y_min[1],double y_max[1],double delta_x[1], double delta_y[1], double **x_centre, double **y_centre,int n_zone_x, int n_zone_y   ),
		   double yy[], double ans[]){
	
	
	
	
	double h=1.e-8, err;
	int i,j,nn, indice, indice2;
	double errt,fac,hh,**a , xxx;
	double veclocal1[ndim],veclocal2[ndim];
	
	a = (double **)malloc((size_t) (NTAB)*sizeof(double *));
	for (nn=0; nn < NTAB; nn++){
		a[nn]= (double *)malloc((size_t) (NTAB)*sizeof(double ));
	}
	
	for (indice=0; indice<ndim ; indice++){
		
		hh=h;
		for (indice2=0; indice2<ndim ; indice2++ ){
			if (indice2 == indice){
				veclocal1[indice2]= yy[indice2]+hh;
				veclocal2[indice2]= yy[indice2]-hh;
			} else {
				veclocal1[indice2] = yy[indice2];
				veclocal2[indice2] = yy[indice2];
			}
		}
		
		/*  a[0][0]=( (func)(veclocal1) - (func)(veclocal2)  )/(2.0*hh);*/
		a[0][0]=( (func)(n,ordre_polynome,nombre_coefficient,ndim,  (veclocal1)   ,x_centre_tot,y_centre_tot,dimension_max,x,y,t,x_min, x_max,  y_min, y_max, delta_x,  delta_y, x_centre, y_centre, n_zone_x, n_zone_y  ) - (func)(n,ordre_polynome,nombre_coefficient,ndim,  (veclocal2)   ,x_centre_tot,y_centre_tot,dimension_max,x,y,t,x_min, x_max,  y_min, y_max, delta_x,  delta_y, x_centre, y_centre, n_zone_x, n_zone_y  )  )/(2.0*hh);
		
		err=BIG;
		for(i=1 ; i<NTAB ;  i++ ){
			hh /= CON;
			
			for (indice2=0; indice2<ndim ; indice2++ ){
				if (indice2 == indice){
					veclocal1[indice2]= yy[indice2]+hh;
					veclocal2[indice2]= yy[indice2]-hh;
				} else {
					veclocal1[indice2] = yy[indice2];
					veclocal2[indice2] = yy[indice2];
				}
			}
			
			//      a[0][i]= ( (func)(veclocal1) - (func)(veclocal2)  )/(2.0*hh);
			a[0][i]=( (func)(n,ordre_polynome,nombre_coefficient,ndim,  (veclocal1)   ,x_centre_tot,y_centre_tot,dimension_max,x,y,t,x_min, x_max,  y_min, y_max, delta_x,  delta_y, x_centre, y_centre, n_zone_x, n_zone_y  ) - (func)(n,ordre_polynome,nombre_coefficient,ndim,  (veclocal2)   ,x_centre_tot,y_centre_tot,dimension_max,x,y,t,x_min, x_max,  y_min, y_max, delta_x,  delta_y, x_centre, y_centre, n_zone_x, n_zone_y  )  )/(2.0*hh);
			
			
			fac = CON2;
			for (j=1 ; j<i; j++){
				a[j][i]= (a[j-1][i]*fac-a[j-1][i-1])/(fac-1.0);
				fac = CON2*fac;
				errt=FMAX(  fabs(a[j][i]-a[j-1][i]) , fabs(a[j][i]-a[j-1][i-1])  );
				if (errt <= err){
					err = errt;
					
					ans[indice] = a[j][i];
				}
			}
			if (fabs(a[i][i]-a[i-1][i-1]) >= SAFE*(err)) break;
		}
		
	}
	return ;
	
}
/*****************************************************************/
/*****************************************************************/
/*****************************************************************/
/*****************************************************************/
/*****************************************************************/
/*****************************************************************/
/*****************************************************************/
/*****************************************************************/
/*****************************************************************/
/*****************************************************************/
/*****************************************************************/
/*****************************************************************/
/*****************************************************************/
/*****************************************************************/
/*****************************************************************/
/*****************************************************************/
/*****************************************************************/
/*****************************************************************/
/*****************************************************************/
/*****************************************************************/
/*****************************************************************/
/*****************************************************************/
/*****************************************************************/
/*****************************************************************/
/*****************************************************************/
/*****************************************************************/
/*****************************************************************/
/*****************************************************************/


/*****************************************************************/
/*******                  main                           *********/
/*****************************************************************/
int main(int argc, char *argv[]){	

FILE *fp1,*coord,*fp2,*fp3,*fp4;
int i,j,k;     //used for counting in loops

// Variables for Trajectory Generation
int N_g,sd,n;
double x_g,y_g,ttime,x_g_observed,y_g_observed,xint,yint;
double theta,gamma,a_g,xprev_g,yprev_g,intensprev,ttimeprev,DT_g,D_g_1,D_g_2,a_noise,Pos_Noise,L;
long seed= -time(NULL);
double LBox;
double **CentPos;
double temp1,temp2,temp3;
double *x,*y,*t;
	
// Variables for Inference Part
double x_min[1],x_max[1],y_min[1],y_max[1],x_centre_tot[1],y_centre_tot[1];
double **x_centre, **y_centre;
int **quelle_zone_occupee,**counts_in_zone;
double delta_x[1],delta_y[1],f_retour_init;
int nombre_total_de_varaibles[1],n_zone_x,n_zone_y,ndim;
double *coefficient_et_D_init_puis_resultat;
double ordre_polynome,nombre_coefficient;
double gtol=1.e-8;
int iter1[1],iter2[1];
double fret1[1],fret2[1];
double dimension_max[1];
double orth_kx,orth_ky;
double D_resultat,Evidence,AkaikeIC,AkaikeICc,minuslogProb,BIC;
double moyenne_coefficient[100], standard_coefficient[100], post_D[200][3] ;

// Variables for the output
double summary[5][7];
double Dmean;	
	

	
n_zone_x=10;  //Mesh
n_zone_y=10;  //Mesh
	

	

//fprintf(stdout,"New Dataset: experiment %i of %i\t repeat %i of %i\n", experiments,max_experiments,repeats,max_repeats);


	


/*****************************************************************************************************/
/*****************************************************************************************************/
/*****************************************************************************************************/
/********			             Read Trajectory File                   ******************************/
/*****************************************************************************************************/
/*****************************************************************************************************/
/*****************************************************************************************************/
i = 0;
j = 0;
coord=fopen("Traj.txt","r"); // CHANGE FILE NAME HERE
while(!feof(coord)){
	fscanf(coord, "%lf\t%lf\t%lf\n", &temp1,&temp2,&temp3);
	if (temp1 == 0 && temp2 ==0){
	} else {
		i=i+1;
		
	}
}
n=i;
fclose(coord);
	
coord=fopen("Traj.txt","r"); // CHANGE FILE NAME HERE
	
	
x=                                     (double *)malloc((size_t) n*sizeof(double));
y=                                     (double *)malloc((size_t) n*sizeof(double));
t=                                     (double *)malloc((size_t) n*sizeof(double));
	
	while(!feof(coord)){
		fscanf(coord, "%lf\t%lf\t%lf\n", &temp1,&temp2,&temp3);
		
		if (temp1 == 0 && temp2 == 0){
		} else {
			x[j]              = temp1;
			y[j]              = temp2;
			t[j]              = temp3;
			j=j+1;
			fprintf(stdout,"%f %f %f\n",temp1,temp2,temp3);            
		}
	}
	
	
	fclose(coord);

/*****************************************************************************************************/
/*****************************************************************************************************/
/*******************************            Inference           **************************************/
/*****************************************************************************************************/
/*****************************************************************************************************/

	f_retour_init=1e100;
	logProb=0.0;
	minuslogProb=logProb;
	
	
	quelle_zone_occupee=                                           (int    **)malloc((size_t) n_zone_x*sizeof(int    *));
	counts_in_zone=                                                (int    **)malloc((size_t) n_zone_x*sizeof(int    *));
	x_centre=                                                      (double **)malloc((size_t) n_zone_x*sizeof(double *));
	y_centre=                                                      (double **)malloc((size_t) n_zone_x*sizeof(double *));
	for (i=0; i<n_zone_x; i++){
		quelle_zone_occupee[i]=                                     (int     *)malloc((size_t) n_zone_y*sizeof(int     ));
		counts_in_zone[i]=	                                        (int     *)malloc((size_t) n_zone_y*sizeof(int     ));
		x_centre[i]=                                                (double  *)malloc((size_t) n_zone_y*sizeof(double  ));
		y_centre[i]=                                                (double  *)malloc((size_t) n_zone_y*sizeof(double  ));
	}	


	
	
	
	
	decoupeur(n, n_zone_x, n_zone_y, x, y, t,x_min, x_max, y_min, y_max, delta_x,  delta_y, quelle_zone_occupee, counts_in_zone, nombre_total_de_varaibles, x_centre, y_centre, x_centre_tot,y_centre_tot );
	
	
	/* Inference of the different models here */
	
	/***** MODEL 1: Pure brownian motion with constant D ******/
	Model=1;
	ndim=1; //number of filled mesh domains
	
	nombre_coefficient = 0;

	coefficient_et_D_init_puis_resultat=                                     (double *)malloc((size_t) ndim*sizeof(double));
	for (i=0; i<ndim; i++){
		coefficient_et_D_init_puis_resultat[i]=1.0;
	}
	
	/******* INFERENCE  *****/
	
	dfpmin(n, ordre_polynome, nombre_coefficient, ndim, x_centre_tot, y_centre_tot,dimension_max, x, y, t, x_min,x_max, y_min, y_max,delta_x,delta_y, x_centre, y_centre   , n_zone_x, n_zone_y , coefficient_et_D_init_puis_resultat , gtol, iter1, fret1,(posterior_of_the_motion),(dfunc) );
	minuslogProb=logProb;

	
	summary[0][0]=coefficient_et_D_init_puis_resultat[0];
	summary[0][1]=ndim;
	summary[0][2]=minuslogProb;
	fprintf(stderr,"Model 1: Brownian Motion Dconst D= %f\t -log(P)= %f\n",coefficient_et_D_init_puis_resultat[0],minuslogProb);
	
		
	/******************   Calculate Akaike Information Criterion************************************/
    AkaikeIC=2*ndim-2*-1*minuslogProb;                     // look for minimum AIC
    AkaikeICc=AkaikeIC+(2*ndim*(ndim+1)/(n-ndim-1));
    
    /******************   Calculate Bayesian Information Criterion************************************/
	BIC=-2*-1*minuslogProb+ndim*log(n);  // look for minimum BIC
	
	
	summary[0][3]=0.0;
	summary[0][4]=AkaikeIC;
	summary[0][5]=AkaikeICc;
	summary[0][6]=BIC;
	
	
	
	
    
   
	/***** MODEL 2: Brownian motion in 2nd Order Pot ******/
	Model=4;
	
	ordre_polynome=2;
	
	/******* NUMBER of variables to be optimized *******/
    
    nombre_coefficient = (ordre_polynome+1)*(ordre_polynome+2)/2-1;
    ndim = nombre_coefficient+1;
    
    coefficient_et_D_init_puis_resultat=                                     (double *)malloc((size_t) ndim*sizeof(double));
      for (k=0; k<ndim-1; k++){
	  coefficient_et_D_init_puis_resultat[k]=0.;
      }
      coefficient_et_D_init_puis_resultat[ndim-1]=1.0;

	
	/******* INFERENCE  *****/
	
	dfpmin(n, ordre_polynome, nombre_coefficient, ndim, x_centre_tot, y_centre_tot,dimension_max, x, y, t, x_min,x_max, y_min, y_max,delta_x,delta_y, x_centre, y_centre   , n_zone_x, n_zone_y , coefficient_et_D_init_puis_resultat , gtol, iter1, fret1,(posterior_of_the_motion),(dfunc) );
	minuslogProb=logProb;
	
	/************************    Orthogonalization of kx and ky    **********************************/
	  orth_kx=0.0;
	  orth_ky=0.0;
	  orth_kx=(coefficient_et_D_init_puis_resultat[2]+coefficient_et_D_init_puis_resultat[4]+sqrt(pow(coefficient_et_D_init_puis_resultat[2]-coefficient_et_D_init_puis_resultat[4],2)+4.0*pow(coefficient_et_D_init_puis_resultat[3],2)))/(2);
	  orth_ky=(coefficient_et_D_init_puis_resultat[2]+coefficient_et_D_init_puis_resultat[4]-sqrt(pow(coefficient_et_D_init_puis_resultat[2]-coefficient_et_D_init_puis_resultat[4],2)+4.0*pow(coefficient_et_D_init_puis_resultat[3],2)))/(2);
	  coefficient_et_D_init_puis_resultat[2]=orth_kx;
	  coefficient_et_D_init_puis_resultat[4]=orth_ky;
	  coefficient_et_D_init_puis_resultat[3]=0.0;
	  
	  
  	summary[1][0]=coefficient_et_D_init_puis_resultat[ndim-1];
	summary[1][1]=ndim;
	summary[1][2]=minuslogProb;
	fprintf(stderr,"Model 2: Brownian Motion in 2nd Order Pot D= %f\t k= %f\t -log(P)= %f\n",coefficient_et_D_init_puis_resultat[ndim-1],2.0*sqrt(orth_kx*orth_kx+orth_ky*orth_ky),minuslogProb);
	
	  
		
	/******************   Calculate Akaike Information Criterion ************************************/
    AkaikeIC=2*ndim-2*-1*minuslogProb;
    AkaikeICc=AkaikeIC+(2*ndim*(ndim+1)/(n-ndim-1));
    
    /******************   Calculate Bayesian Information Criterion************************************/
	BIC=-2*-1*minuslogProb+ndim*log(n);
	
	
	summary[1][3]=0.0;
	summary[1][4]=AkaikeIC;
	summary[1][5]=AkaikeICc;
	summary[1][6]=BIC;
	
	

	
/*****************************************************************************************************/

/***** MODEL 3: Brownian motion in 4th order Pot ******/
	Model=4;
	
	ordre_polynome=4;
	
	/******* NUMBER of variables to be optimized *******/
    
    nombre_coefficient = (ordre_polynome+1)*(ordre_polynome+2)/2-1;
    ndim = nombre_coefficient+1;
    
    coefficient_et_D_init_puis_resultat=                                     (double *)malloc((size_t) ndim*sizeof(double));
      for (k=0; k<ndim-1; k++){
	  coefficient_et_D_init_puis_resultat[k]=0.;
      }
      coefficient_et_D_init_puis_resultat[ndim-1]=1.0;

	
	/******* INFERENCE  *****/
	
	dfpmin(n, ordre_polynome, nombre_coefficient, ndim, x_centre_tot, y_centre_tot,dimension_max, x, y, t, x_min,x_max, y_min, y_max,delta_x,delta_y, x_centre, y_centre   , n_zone_x, n_zone_y , coefficient_et_D_init_puis_resultat , gtol, iter1, fret1,(posterior_of_the_motion),(dfunc) );
	minuslogProb=logProb;
	
	/************************    Orthogonalization of kx and ky    **********************************/
	  orth_kx=0.0;
	  orth_ky=0.0;
	  orth_kx=(coefficient_et_D_init_puis_resultat[2]+coefficient_et_D_init_puis_resultat[4]+sqrt(pow(coefficient_et_D_init_puis_resultat[2]-coefficient_et_D_init_puis_resultat[4],2)+4.0*pow(coefficient_et_D_init_puis_resultat[3],2)))/(2);
	  orth_ky=(coefficient_et_D_init_puis_resultat[2]+coefficient_et_D_init_puis_resultat[4]-sqrt(pow(coefficient_et_D_init_puis_resultat[2]-coefficient_et_D_init_puis_resultat[4],2)+4.0*pow(coefficient_et_D_init_puis_resultat[3],2)))/(2);
	  coefficient_et_D_init_puis_resultat[2]=orth_kx;
	  coefficient_et_D_init_puis_resultat[4]=orth_ky;
	  coefficient_et_D_init_puis_resultat[3]=0.0;
	  
	  
  	summary[2][0]=coefficient_et_D_init_puis_resultat[ndim-1];
	summary[2][1]=ndim;
	summary[2][2]=minuslogProb;
	fprintf(stderr,"Model 3: Brownian Motion in 4th Order Pot D= %f\t k= %f\t -log(P)= %f\n",coefficient_et_D_init_puis_resultat[ndim-1],2.0*sqrt(orth_kx*orth_kx+orth_ky*orth_ky),minuslogProb);
	
	  
	
	/******************   Calculate Akaike Information Criterion ************************************/
    AkaikeIC=2*ndim-2*-1*minuslogProb;
    AkaikeICc=AkaikeIC+(2*ndim*(ndim+1)/(n-ndim-1));
    
    /******************   Calculate Bayesian Information Criterion************************************/
	BIC=-2*-1*minuslogProb+ndim*log(n);
	


	summary[2][3]=0.0;
	summary[2][4]=AkaikeIC;
	summary[2][5]=AkaikeICc;
	summary[2][6]=BIC;
	
	
	
	
/*****************************************************************************************************/


/*****************************************************************************************************/
/*******************************         Decision Making        **************************************/
/*****************************************************************************************************/
/*****************************************************************************************************/
	
        
    
    // OUTPUT of model selection
    fp3=fopen("DECISION.txt","w");
	for (i=0; i<3; i++){
        fprintf(fp3,"%f\t %f\t %f\n",summary[i][6],summary[i][4],summary[i][5]); 
        }
    fclose(fp3);
    
    // DECISION.txt shows the following:
    /*
    Modality:                  BIC   AIC   AICc
    Model 1   (free Brownian): Value Value Value
    Model 2 (2nd Order Conf.): Value Value Value
    Model 3 (4th Order Conf.): Value Value Value
    
    Interpretation:
    The lowest value in each column is the selected model.    
    */                
        
	
	
	
	

exit(0);
}	
/*****************************************************************/
/*****************************************************************/
