# Supplementary material for: Bayesian Decision Tree for the Classification of the Mode of Motion in Single-Molecule Trajectories
Source: PLoS One. 2013 Dec 20;8(12):e82799. doi: 10.1371/journal.pone.0082799 (PMC3869729; doi:10.1371/journal.pone.0082799)
Supplement: Source Code S5 — Code in C ( nrutil.c ) is required to run Model distinction in trajectory.c (Source Code S4). (C) [file pone.0082799.s012.c]

#include <stdio.h>
#include <stddef.h>
#include <stdlib.h>
#include "nrutil.h"

#define NR_END 1
#define FREE_ARG char*

void nerror(char error_text[])
/* Numerical Recipes standard error handler*/
{
	fprintf(stderr, "Numerical Recipes run-time error...\n");
	fprintf(stderr, "%s\n", error_text);
	fprintf(stderr, "...now exiting to system...\n");
	exit(1);
}

double *vector(long nl, long nh)
/* Allocate a double vector with subscript range v[nl...nh]*/
{
	double *v;
	
	v=(double *) malloc( (size_t) ((nh-nl+1+NR_END)*sizeof(double)));
	if (!v) nerror("allocation failure in vector()");
	return v-nl+NR_END;
}

int *ivector(long nl, long nh)
/* Allocate a double vector with subscript range v[nl...nh]*/
{
	int *v;
	
	v=(int *) malloc( (size_t) ((nh-nl+1+NR_END)*sizeof(int)));
	if (!v) nerror("allocation failure in vector()");
	return v-nl+NR_END;
}


double **matrix(long nrl, long nrh, long ncl, long nch)
/* Allocate a double matrix with subscript range mm[nrl...nrh][ncl...nch]*/
{
	long i, nrow=nrh-nrl+1, ncol=nch+ncl+1;
	double **m;
	
	/*allocate pointers to rows*/
	m=(double **) malloc( (size_t) ((nrow+NR_END)*sizeof(double*)));
	if (!m) nerror("allocation failure 1 in matrix()");
	m += NR_END;
	m -= nrl;
	
	/*allocate rows and set pointers to them*/
	m[nrl]=(double *) malloc( (size_t) ((nrow*ncol+NR_END)*sizeof(double)));
	if(!m[nrl]) nerror("allocation failure 2 in matrix()");
	m[nrl] += NR_END;
	m[nrl] -= ncl;
	
	for(i=nrl+1; i<=nrh; i++) m[i]=m[i-1]+ncol;
	
	return m;
}
	
void free_vector(double *v, long nl, long nh)
/* free a double vector allocated with vector()*/
{
	free((FREE_ARG)(v+nl-NR_END));
}

void free_ivector(int *v, long nl, long nh)
/* free a int vector allocated with ivector()*/
{
	free((FREE_ARG)(v+nl-NR_END));
}

void free_matrix(double **m, long nrl, long nrh, long ncl, long nch)
/* free a double matrix allocated by matrix()*/
{
	free((FREE_ARG)(m[nrl]+ncl-NR_END));
	free((FREE_ARG)(m+nrl-NR_END));
}
