# Supplementary material for: Bayesian Decision Tree for the Classification of the Mode of Motion in Single-Molecule Trajectories
Source: PLoS One. 2013 Dec 20;8(12):e82799. doi: 10.1371/journal.pone.0082799 (PMC3869729; doi:10.1371/journal.pone.0082799)
Supplement: Source Code S6 — Code in C ( nrutil.h ) is required to run Model distinction in trajectory.c (Source Code S4). (H) [file pone.0082799.s013.h]

#ifndef _NR_UTILS_H_
#define _NR_UTILS_H_

static double sqrarg;


static double maxarg1, maxarg2;


#if defined(__STDC__) || defined(ANSI) || defined(NRANSI)

void nrerror(char error_text[]);
double *vector(long nl, long nh);
int *ivector(long nl, long nh);
double **matrix(long nrl, long nrh, long ncl, long nch);
void free_vector(double *v, long nl, long nh);
void free_ivector(int *v, long nl, long nh);
void free_matrix(double **m, long nrl, long nrh, long ncl, long nch);

#else 

void nrerror();
double *vector();

#endif

#endif 
