# Supplementary material for: Bayesian Decision Tree for the Classification of the Mode of Motion in Single-Molecule Trajectories
Source: PLoS One. 2013 Dec 20;8(12):e82799. doi: 10.1371/journal.pone.0082799 (PMC3869729; doi:10.1371/journal.pone.0082799)
Supplement: Source Code S7 — Code in C ( simplex.c ) is required to run Model distinction in trajectory.c (Source Code S4). (C) [file pone.0082799.s014.c]

#include <math.h>
#include "nrutil.c"

#define TINY 1.0e-10
#define NMAX 5000
#define GET_PSUM \
  for (j=1;j<=ndim;j++){\
    for(sum=0.0,i=1;i<=mpts;i++) sum += p[i][j];\
    psum[j]=sum;}
#define SWAP(a,b) {swap=(a); (a)=(b); (b)=swap;}

void amoeba(double **p, double y[], int ndim, double ftol, double (*funk)(double []),
	    int *nfunk)
/******************************************************************************/
/* Multidimensional minimization of the function funk(x) where x[1..ndim] is  */
/* a vector in ndim dimensions, by the downhill simplex method of Nelder and  */
/* Mead. The matrix p[1..ndim+1][1..ndim] is input. Its ndim+1 rows are ndim- */
/* dimensionql vectors which are the vertices of the starting simplex. Also   */
/* input is the vector y[1..ndim+1] whose components must be pre-initialized  */
/* to the values of funk evaluated at the ndim+1 vertices (rows) of p; and    */
/* ftol the fractional convergence tolerance to be achieved in the function   */
/* value. On output, p and y will have been reset to ndim+1 all within ftol   */
/* of a minimum function value, and nfunk gives the number of function        */
/* evaluations taken.                                                         */
/* Taken from Numerical Recipes in C, p. 411.
/******************************************************************************/
{
  double amotry(double **p, double y[], double psum[], int ndim, double (*funk)(double []),
	       int ihi, double fac);
  int i,ihi,ilo,inhi,j,mpts=ndim+1;
  double rtol,sum,swap,ysave,ytry,*psum;

  psum=vector(1,ndim);
  *nfunk=0;
  GET_PSUM
  for(;;){
    ilo=1;
    ihi = y[1]>y[2] ? (inhi=2,1):(inhi=1,2);
    for (i=1;i<=mpts;i++){
      if (y[i] <= y[ilo]) ilo=i;
      if (y[i] > y[ihi]){
	inhi=ihi;
	ihi=i;
      } else if (y[i]>y[inhi] && i!=ihi) inhi=i;
    }
    rtol=2.0*fabs(y[ihi]-y[ilo])/(fabs(y[ihi])+fabs(y[ilo])+TINY);
    if (rtol < ftol){
      SWAP(y[1],y[ilo])
      for (i=1;i<=ndim;i++) SWAP(p[1][i],p[ilo][i])
      break;
    }
    if(*nfunk>=NMAX) nerror("NMAX exceeded");
    *nfunk +=2;
    ytry=amotry(p,y,psum,ndim,funk,ihi,-1.0);
    if (ytry <= y[ilo])
      ytry=amotry(p,y,psum,ndim,funk,ihi,2.0);
    else if (ytry >= y[inhi]) {
      ysave=y[ihi];
      ytry=amotry(p,y,psum,ndim,funk,ihi,0.5);
      if (ytry >= ysave){
	for (i=1;i<=mpts;i++){
	  if (i!=ilo){
	    for (j=1;j<=ndim;j++)
	      p[i][j]=psum[j]=0.5*(p[i][j]+p[ilo][j]);
	    y[i]=(*funk)(psum);
	  }
	}
	*nfunk += ndim;
	GET_PSUM
      }
    } else --(*nfunk);
  }
  free_vector(psum,1,ndim);
}


double amotry(double **p, double y[], double psum[], int ndim, double (*funk)(double []),

	     int ihi, double fac)
/*********************************************************************************/
/* Explorates by a factor fac through the face of the simplex across the high    */
/* point, tries it, and replaces the high point if the new point is better.      */
/*********************************************************************************/
{
  int j;
  double fac1,fac2,ytry,*ptry;

  ptry=vector(1,ndim);
  fac1=(1.0-fac)/ndim;
  fac2=fac1-fac;
  for (j=1;j<=ndim;j++) ptry[j]=psum[j]*fac1-p[ihi][j]*fac2;
  ytry=(*funk)(ptry);
  if (ytry < y[ihi]) {
    y[ihi]=ytry;
    for (j=1;j<=ndim;j++){
      psum[j] += ptry[j]-p[ihi][j];
      p[ihi][j]=ptry[j];
    }
  }
  free_vector(ptry,1,ndim);
  return ytry;
}


/***************************************** TEST **************************************/

/*
double function(double x[])
{
  double f;
  f=x[1]+pow(x[1],4.0)-x[1]*x[1]+x[2]*x[2];

  return f;
}

main()
{
  int i,nfunk,ndim=2;
  double **p;
  double y[ndim+2];
  double ftol=1.0e-10;

  p=matrix(1,ndim+1,1,ndim);
  p[1][1]=2.0;
  p[1][2]=2.0;
  p[2][1]=-5.0;
  p[2][2]=3.0;
  p[3][1]=-10.0;
  p[3][2]=-5.0;

  for(i=1;i<=ndim+1;i++){
    y[i]=function(p[i]);
    printf("%d %f\n",i,y[i]);
  }
  
  amoeba(p, y, ndim, ftol, function, &nfunk);
  printf("%f %f %f %d\n",p[2][1],p[2][2], sqrt(2.0)/2.0, nfunk);
}

*/
